# Supplementary figures and images for: Oral Microbes are a Signature of Disease in the Gut
Source: Research Square preprint supplement (doi:10.21203/rs.3.rs-1631596/v2), 2023-03-20

Carriage Frequency in Stool vs Oral Microbiomes

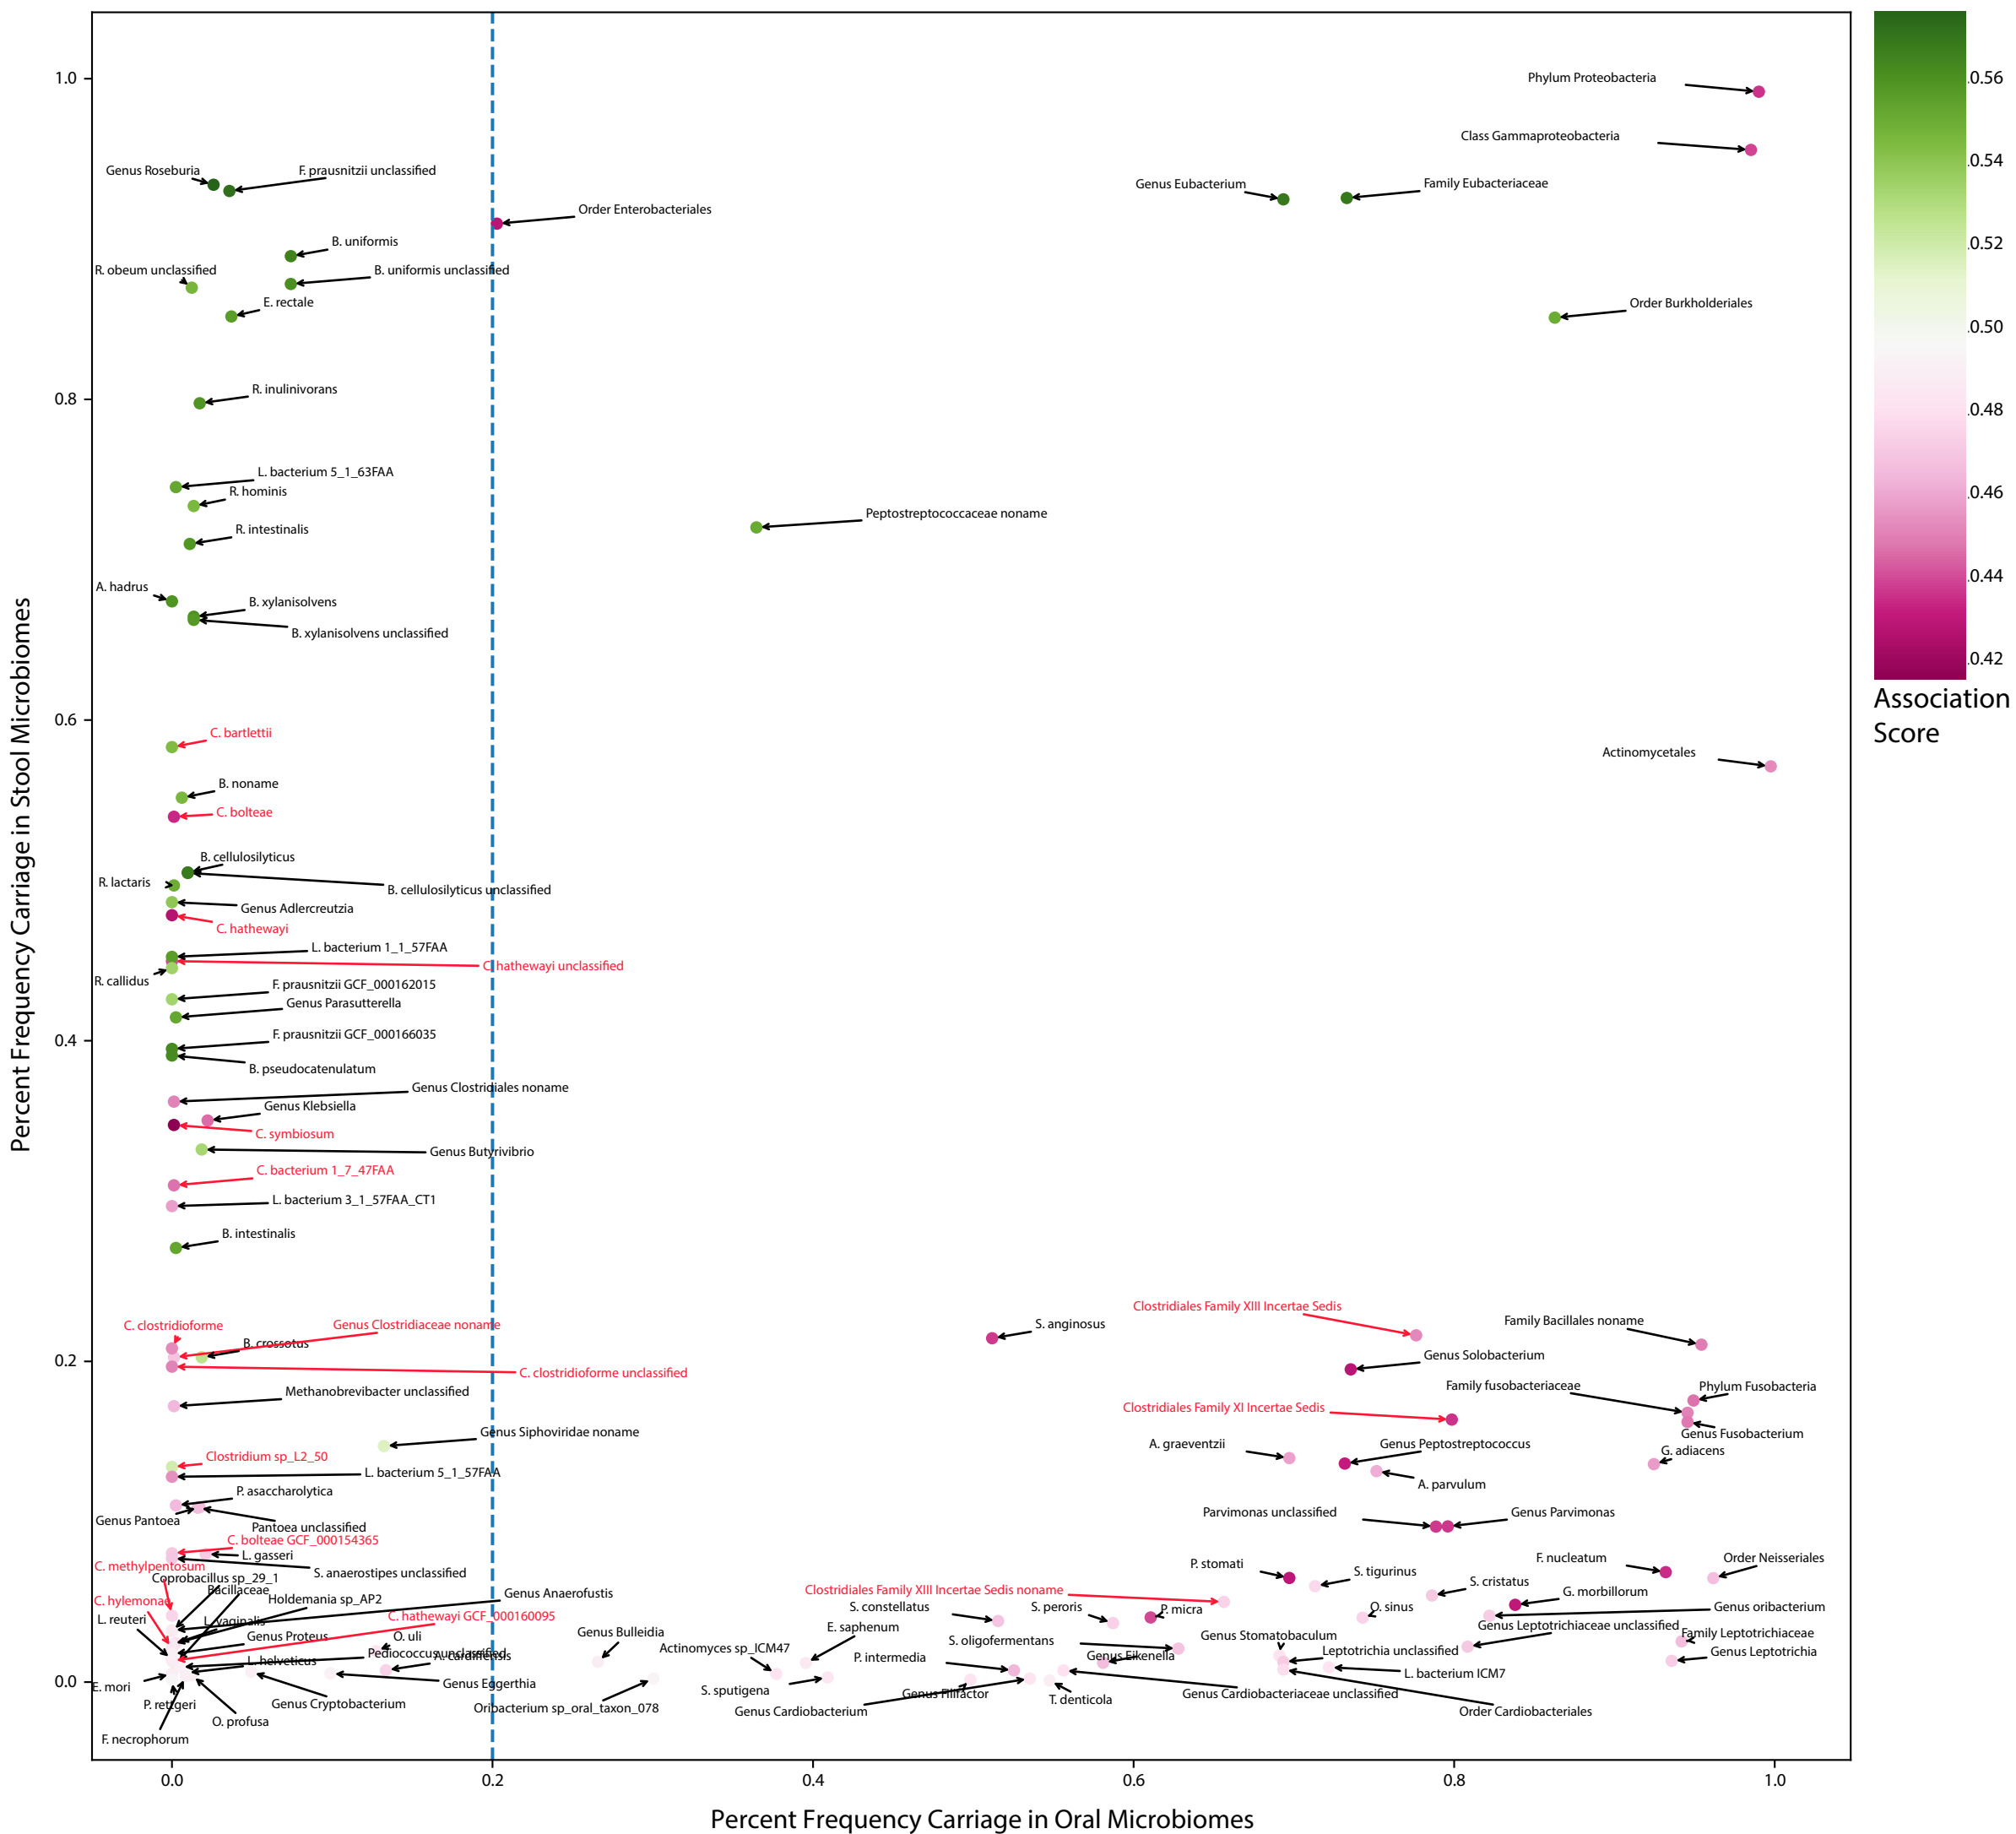

Supplement: Supplementary file 1 [file 05689d6586844bee5fee85d0.pdf]
